# Supplementary material
Source: PubMed Central journal article supplement (PMC3911437)
Supplement: JCM.01973-13_zjm999093095so1.pdf [file JCM.01973-13_zjm999093095so1.pdf]

Table 1S. STs of Lp1 sporadic isolates

| Year received | Lab number | State of origin | ST  | Source           | Gender | Age |
|---------------|------------|-----------------|-----|------------------|--------|-----|
| 1982          | D-17       | FL              | 35  | N/A <sup>a</sup> | N/A    | N/A |
| 1982          | D-38       | CA              | 8   | Lung             | N/A    | N/A |
| 1982          | D-43       | UT              | 555 | N/A              | N/A    | N/A |
| 1982          | D-82       | MA              | 30  | BAL <sup>b</sup> | N/A    | N/A |
| 1982          | D-102      | FL              | 869 | N/A              | N/A    | N/A |
| 1982          | D-113      | TN              | 224 | Lung             | N/A    | N/A |
| 1982          | D-136      | GA              | 35  | Lung             | N/A    | N/A |
| 1982          | D-140      | NY              | 363 | Lung             | N/A    | N/A |
| 1982          | D-141      | NY              | 37  | Sputum           | N/A    | N/A |
| 1982          | D-155      | RI              | 35  | BAL              | N/A    | N/A |
| 1982          | D-159      | CA              | 296 | N/A              | N/A    | N/A |
| 1982          | D-173      | FL              | 42  | BAL              | N/A    | N/A |
| 1982          | D-190      | TN              | 224 | N/A              | N/A    | N/A |
| 1982          | D-193      | CA              | 1   | Lung             | N/A    | N/A |
| 1982          | D-203      | MA              | 703 | Sputum           | N/A    | N/A |
| 1982          | D-285      | CA              | 8   | Lung             | N/A    | N/A |
| 1982          | D-300      | LA              | 154 | N/A              | N/A    | N/A |
| 1982          | D-341      | IN              | 1   | Lung             | N/A    | N/A |
| 1982          | D-353      | VA              | 819 | Lung             | N/A    | N/A |
| 1982          | D-390      | IN              | 36  | Lung             | N/A    | N/A |
| 1983          | D-236      | TN              | 224 | Lung             | N/A    | N/A |
| 1983          | D-257      | MA              | 703 | Pleural fluid    | N/A    | N/A |
| 1983          | D-413      | MI              | 383 | Sputum           | N/A    | N/A |
| 1983          | D-421      | OH              | 143 | Sputum           | N/A    | N/A |
| 1983          | D-465      | HI              | 1   | Pleural fluid    | N/A    | N/A |
| 1983          | D-512      | IL              | 7   | Lung             | N/A    | N/A |
| 1983          | D-532      | MA              | 1   | Sputum           | N/A    | N/A |
| 1983          | D-555      | RI              | 1   | Sputum           | N/A    | N/A |
| 1983          | D-573      | MO              | 870 | Lung             | Female | N/A |
| 1983          | D-590      | TN              | 36  | Lung             | N/A    | N/A |
| 1983          | D-591      | NY              | 363 | Sputum           | N/A    | N/A |
| 1983          | D-614      | MA              | 154 | BAL              | N/A    | N/A |
| 1983          | D-634      | MD              | 1   | Lung             | N/A    | N/A |
| 1983          | D-647      | VA              | 259 | TTA <sup>c</sup> | N/A    | N/A |

|      |        |    |     |               |        |     |
|------|--------|----|-----|---------------|--------|-----|
| 1983 | D-661  | NY | 363 | Sputum        | N/A    | N/A |
| 1983 | D-664  | CA | 59  | N/A           | N/A    | N/A |
| 1983 | D-666  | IL | 7   | Lung          | N/A    | N/A |
| 1983 | D-679  | RI | 1   | Lung          | N/A    | N/A |
| 1983 | D-683  | FL | 231 | Sputum        | N/A    | N/A |
| 1983 | D-704  | KS | 37  | N/A           | N/A    | N/A |
| 1983 | D-723  | VA | 1   | Lung          | N/A    | N/A |
| 1983 | D-735  | RI | 1   | N/A           | N/A    | N/A |
| 1983 | D-764  | AR | 941 | Sputum        | N/A    | N/A |
| 1983 | D-795  | NY | 37  | Sputum        | N/A    | N/A |
| 1983 | D-804  | FL | 750 | Sputum        | N/A    | N/A |
| 1983 | D-832  | MA | 1   | BAL           | N/A    | N/A |
| 1983 | D-862  | FL | 871 | Sputum        | Male   | N/A |
| 1983 | D-883  | MA | 1   | Sputum        | N/A    | N/A |
| 1983 | D-899  | CA | 1   | N/A           | N/A    | N/A |
| 1984 | D-955  | NM | 58  | Sputum        | N/A    | N/A |
| 1984 | D-975  | FL | 1   | Sputum        | N/A    | N/A |
| 1984 | D-982  | AR | 36  | N/A           | N/A    | N/A |
| 1984 | D-986  | TN | 7   | TTA           | N/A    | N/A |
| 1984 | D-988  | MA | 1   | BAL           | N/A    | N/A |
| 1984 | D-1034 | MA | 42  | Sputum        | N/A    | N/A |
| 1984 | D-1071 | MD | 1   | Sputum        | N/A    | N/A |
| 1984 | D-1077 | MA | 872 | Lung          | Female | N/A |
| 1984 | D-1094 | MD | 1   | Sputum        | N/A    | N/A |
| 1984 | D-1095 | HI | 1   | Sputum        | N/A    | N/A |
| 1984 | D-1096 | MA | 1   | Sputum        | N/A    | N/A |
| 1984 | D-1099 | DE | 750 | N/A           | N/A    | N/A |
| 1984 | D-1107 | DE | 40  | N/A           | N/A    | N/A |
| 1984 | D-1112 | FL | 143 | Lung          | N/A    | N/A |
| 1985 | D-1120 | HI | 1   | BAL           | N/A    | N/A |
| 1985 | D-1121 | OH | 1   | Pleural fluid | N/A    | N/A |
| 1985 | D-1129 | FL | 22  | Sputum        | N/A    | N/A |
| 1985 | D-1137 | SD | 1   | Lung          | N/A    | N/A |
| 1985 | D-1144 | MD | 1   | BAL           | N/A    | N/A |
| 1985 | D-1145 | NC | 873 | TTA           | Male   | 35  |
| 1985 | D-1147 | OH | 40  | BAL           | N/A    | N/A |
| 1985 | D-1171 | MA | 703 | Sputum        | N/A    | N/A |
| 1985 | D-1180 | NM | 62  | TTA           | N/A    | N/A |
| 1985 | D-1187 | NY | 363 | Sputum        | N/A    | N/A |
| 1985 | D-1191 | DE | 259 | N/A           | N/A    | N/A |
| 1985 | D-1196 | DE | 796 | N/A           | N/A    | N/A |
| 1985 | D-1198 | SD | 1   | Lung          | N/A    | N/A |
| 1985 | D-1224 | AZ | 198 | Sputum        | N/A    | N/A |
| 1985 | D-1235 | MD | 62  | Sputum        | N/A    | N/A |

|      |        |    |     |                  |      |     |
|------|--------|----|-----|------------------|------|-----|
| 1985 | D-1255 | MN | 62  | Sputum           | N/A  | N/A |
| 1985 | D-1258 | FL | 42  | Sputum           | N/A  | N/A |
| 1985 | D-1259 | AZ | 1   | Sputum           | N/A  | N/A |
| 1986 | D-1272 | IA | 1   | Sputum           | N/A  | N/A |
| 1986 | D-1376 | SD | 1   | Pleural fluid    | N/A  | N/A |
| 1986 | D-1377 | FL | 231 | BAL              | N/A  | N/A |
| 1986 | D-1410 | OR | 37  | N/A              | N/A  | N/A |
| 1986 | D-1415 | VA | 894 | Sputum           | N/A  | N/A |
| 1986 | D-1423 | CA | 1   | TTA              | N/A  | N/A |
| 1986 | D-1434 | FL | 1   | BAL              | N/A  | N/A |
| 1986 | D-1437 | MD | 824 | TTA              | Male | N/A |
| 1986 | D-1459 | HI | 1   | Sputum           | N/A  | N/A |
| 1986 | D-1478 | DE | 45  | Sputum           | N/A  | N/A |
| 1986 | D-1482 | IL | 296 | BAL              | N/A  | N/A |
| 1986 | D-1585 | DE | 259 | Sputum           | N/A  | N/A |
| 1987 | D-1595 | HI | 259 | N/A              | N/A  | N/A |
| 1987 | D-1621 | SD | 1   | Lung             | N/A  | N/A |
| 1987 | D-1627 | CA | 37  | Sputum           | N/A  | N/A |
| 1987 | D-1673 | OH | 1   | BAL              | N/A  | N/A |
| 1987 | D-1680 | DC | 1   | URS <sup>d</sup> | N/A  | N/A |
| 1987 | D-1691 | FL | 40  | BAL              | N/A  | N/A |
| 1987 | D-1735 | MD | 1   | Lung             | N/A  | N/A |
| 1987 | D-1736 | RI | 1   | Sputum           | N/A  | N/A |
| 1987 | D-1737 | DE | 796 | Sputum           | N/A  | N/A |
| 1987 | D-1739 | UT | 1   | Lung             | N/A  | N/A |
| 1987 | D-1766 | NM | 178 | Blood            | N/A  | N/A |
| 1987 | D-1770 | MD | 251 | Sputum           | N/A  | N/A |
| 1987 | D-1771 | OH | 117 | Sputum           | N/A  | N/A |
| 1987 | D-1822 | AZ | 1   | BAL              | N/A  | N/A |
| 1987 | D-1827 | KS | 1   | BAL              | N/A  | N/A |
| 1987 | D-1873 | NE | 48  | Lung             | N/A  | N/A |
| 1987 | D-1928 | CA | 1   | Lung             | N/A  | N/A |
| 1987 | D-1958 | AZ | 1   | Sputum           | N/A  | N/A |
| 1987 | D-1989 | NJ | 822 | Sputum           | Male | N/A |
| 1988 | D-2001 | CA | 154 | Pleural fluid    | N/A  | N/A |
| 1988 | D-2004 | MI | 259 | Sputum           | N/A  | N/A |
| 1988 | D-2006 | AZ | 1   | BAL              | N/A  | N/A |
| 1988 | D-2020 | OH | 1   | BAL              | N/A  | N/A |
| 1988 | D-2042 | VA | 821 | BAL              | Male | N/A |
| 1988 | D-2078 | MT | 1   | Sputum           | N/A  | N/A |
| 1988 | D-2081 | DE | 62  | Sputum           | N/A  | N/A |
| 1988 | D-2086 | MD | 821 | N/A              | N/A  | N/A |
| 1988 | D-2099 | AZ | 1   | Lung             | N/A  | N/A |
| 1988 | D-2144 | UT | 210 | Pleural fluid    | N/A  | N/A |

|      |        |    |     |               |      |     |
|------|--------|----|-----|---------------|------|-----|
| 1988 | D-2184 | DE | 796 | Sputum        | N/A  | N/A |
| 1988 | D-2185 | NM | 826 | Sputum        | Male | N/A |
| 1988 | D-2188 | TX | 1   | Sputum        | N/A  | N/A |
| 1988 | D-2194 | NM | 827 | N/A           | N/A  | N/A |
| 1988 | D-2198 | OH | 62  | TTA           | N/A  | N/A |
| 1988 | D-2208 | CA | 37  | Sputum        | N/A  | N/A |
| 1988 | D-2216 | OH | 36  | Sputum        | N/A  | N/A |
| 1989 | D-2240 | OH | 203 | Sputum        | N/A  | N/A |
| 1989 | D-2272 | HI | 1   | Sputum        | N/A  | N/A |
| 1989 | D-2369 | GA | 750 | BAL           | N/A  | N/A |
| 1989 | D-2382 | CT | 256 | Sputum        | N/A  | N/A |
| 1989 | D-2431 | TN | 36  | Sputum        | N/A  | N/A |
| 1989 | D-2441 | DE | 796 | Sputum        | N/A  | N/A |
| 1989 | D-2444 | VA | 883 | N/A           | N/A  | N/A |
| 1989 | D-2455 | NM | 815 | BAL           | Male | N/A |
| 1989 | D-2466 | OH | 109 | BAL           | N/A  | N/A |
| 1989 | D-2486 | KS | 224 | N/A           | N/A  | N/A |
| 1989 | D-2487 | MT | 278 | N/A           | N/A  | N/A |
| 1989 | D-2491 | NY | 1   | BAL           | N/A  | N/A |
| 1989 | D-2501 | WA | 1   | Sputum        | N/A  | N/A |
| 1989 | D-2648 | NE | 37  | N/A           | N/A  | N/A |
| 1989 | D-2654 | TX | 36  | Lung          | N/A  | N/A |
| 1990 | D-2680 | OH | 750 | N/A           | N/A  | N/A |
| 1990 | D-2704 | MD | 1   | Sputum        | N/A  | N/A |
| 1990 | D-2708 | KS | 1   | BAL           | N/A  | N/A |
| 1990 | D-2733 | NE | 36  | Pleural fluid | N/A  | N/A |
| 1990 | D-2789 | HI | 788 | Sputum        | N/A  | N/A |
| 1990 | D-2791 | WA | 154 | BAL           | N/A  | N/A |
| 1990 | D-2810 | GA | 121 | BAL           | N/A  | N/A |
| 1990 | D-2870 | CA | 1   | Sputum        | N/A  | N/A |
| 1990 | D-2874 | WI | 37  | Sputum        | N/A  | N/A |
| 1990 | D-2879 | NM | 618 | Sputum        | N/A  | N/A |
| 1990 | D-2893 | MN | 62  | N/A           | N/A  | N/A |
| 1990 | D-2894 | CT | 232 | N/A           | N/A  | N/A |
| 1990 | D-2905 | UT | 1   | N/A           | N/A  | N/A |
| 1990 | D-2908 | NY | 36  | Sputum        | N/A  | N/A |
| 1990 | D-2915 | SC | 294 | N/A           | N/A  | N/A |
| 1990 | D-2941 | CA | 874 | N/A           | N/A  | N/A |
| 1991 | D-2985 | SD | 809 | N/A           | Male | N/A |
| 1991 | D-2997 | HI | 1   | Sputum        | N/A  | N/A |
| 1991 | D-3018 | LA | 37  | Sputum        | N/A  | N/A |
| 1991 | D-3019 | SD | 1   | N/A           | N/A  | N/A |
| 1991 | D-3068 | OH | 42  | N/A           | N/A  | N/A |
| 1991 | D-3091 | MO | 1   | Pleural fluid | N/A  | N/A |

|      |        |    |     |               |        |     |
|------|--------|----|-----|---------------|--------|-----|
| 1991 | D-3092 | IL | 143 | URS           | N/A    | N/A |
| 1991 | D-3124 | KS | 1   | Sputum        | N/A    | N/A |
| 1991 | D-3137 | CA | 818 | N/A           | Female | N/A |
| 1991 | D-3142 | IN | 36  | Sputum        | N/A    | N/A |
| 1991 | D-3161 | CO | 799 | N/A           | Female | N/A |
| 1991 | D-3183 | SC | 819 | BAL           | Female | N/A |
| 1991 | D-3192 | MA | 203 | Sputum        | N/A    | N/A |
| 1991 | D-3250 | OH | 62  | Sputum        | N/A    | N/A |
| 1991 | D-3269 | DE | 703 | N/A           | N/A    | N/A |
| 1992 | D-3276 | OH | 62  | Sputum        | N/A    | N/A |
| 1992 | D-3278 | NM | 816 | Sputum        | Male   | N/A |
| 1992 | D-3286 | AZ | 59  | N/A           | N/A    | N/A |
| 1992 | D-3287 | HI | 817 | BAL           | Male   | N/A |
| 1992 | D-3288 | MO | 143 | Sputum        | N/A    | N/A |
| 1992 | D-3291 | RI | 1   | N/A           | N/A    | N/A |
| 1992 | D-3316 | CO | 1   | Lung          | N/A    | N/A |
| 1992 | D-3375 | VA | 1   | Lung          | N/A    | N/A |
| 1992 | D-3388 | WA | 59  | Sputum        | N/A    | N/A |
| 1992 | D-3415 | KS | 814 | Sputum        | Male   | N/A |
| 1992 | D-3429 | MO | 212 | Lung          | N/A    | N/A |
| 1992 | D-3434 | VA | 259 | TTA           | N/A    | N/A |
| 1992 | D-3447 | CA | 284 | N/A           | N/A    | N/A |
| 1992 | D-3481 | RI | 259 | Sputum        | N/A    | N/A |
| 1992 | D-3506 | GA | 42  | BAL           | N/A    | N/A |
| 1992 | D-3590 | OH | 213 | BAL           | N/A    | N/A |
| 1993 | D-3626 | NC | 1   | Lung          | N/A    | N/A |
| 1993 | D-3636 | VA | 259 | Sputum        | N/A    | N/A |
| 1993 | D-3637 | GA | 36  | N/A           | N/A    | N/A |
| 1993 | D-3638 | OH | 259 | BAL           | N/A    | N/A |
| 1993 | D-3680 | CT | 820 | N/A           | Female | N/A |
| 1993 | D-3694 | CO | 36  | Sputum        | N/A    | N/A |
| 1993 | D-3695 | RI | 1   | Sputum        | N/A    | N/A |
| 1993 | D-3705 | PA | 812 | Sputum        | Male   | N/A |
| 1993 | D-3707 | AZ | 813 | N/A           | Male   | N/A |
| 1993 | D-3737 | TX | 1   | Pleural fluid | N/A    | N/A |
| 1993 | D-3738 | IL | 1   | Lung          | N/A    | N/A |
| 1993 | D-3745 | NE | 1   | N/A           | N/A    | N/A |
| 1993 | D-3748 | OR | 1   | N/A           | N/A    | N/A |
| 1993 | D-3753 | ID | 37  | Sputum        | N/A    | N/A |
| 1993 | D-3755 | MA | 662 | N/A           | N/A    | N/A |
| 1993 | D-3766 | NJ | 36  | Sputum        | N/A    | N/A |
| 1993 | D-3871 | HI | 702 | BAL           | N/A    | N/A |
| 1994 | D-3888 | CO | 1   | Sputum        | N/A    | N/A |
| 1994 | D-3892 | OH | 259 | Throat swab   | N/A    | N/A |

|      |        |    |     |        |        |     |
|------|--------|----|-----|--------|--------|-----|
| 1994 | D-3912 | IL | 810 | Sputum | Female | N/A |
| 1994 | D-3933 | OH | 1   | BAL    | N/A    | N/A |
| 1994 | D-3934 | AZ | 811 | BAL    | Male   | N/A |
| 1994 | D-3943 | MN | 59  | Sputum | N/A    | N/A |
| 1994 | D-3959 | NM | 545 | Sputum | N/A    | N/A |
| 1994 | D-3994 | CA | 345 | BAL    | N/A    | N/A |
| 1994 | D-3996 | CT | 150 | Sputum | N/A    | N/A |
| 1994 | D-3997 | CA | 48  | BAL    | N/A    | N/A |
| 1994 | D-4017 | CT | 205 | Sputum | N/A    | N/A |
| 1994 | D-4018 | MA | 62  | Sputum | N/A    | N/A |
| 1994 | D-4021 | MA | 62  | N/A    | N/A    | N/A |
| 1994 | D-4029 | RI | 37  | Sputum | N/A    | N/A |
| 1994 | D-4051 | MO | 224 | N/A    | N/A    | N/A |
| 1994 | D-4080 | MT | 109 | Sputum | N/A    | N/A |
| 1995 | D-4099 | CT | 74  | BAL    | N/A    | N/A |
| 1995 | D-4102 | MA | 109 | Sputum | N/A    | N/A |
| 1995 | D-4105 | OH | 259 | sputum | N/A    | N/A |
| 1995 | D-4117 | IL | 788 | Sputum | N/A    | N/A |
| 1995 | D-4123 | MO | 36  | BAL    | N/A    | N/A |
| 1995 | D-4152 | WI | 89  | N/A    | N/A    | N/A |
| 1995 | D-4153 | MT | 421 | BAL    | N/A    | N/A |
| 1995 | D-4158 | IA | 35  | Sputum | N/A    | N/A |
| 1995 | D-4179 | CA | 37  | Sputum | N/A    | N/A |
| 1995 | D-4183 | NM | 825 | Sputum | Female | 72  |
| 1995 | D-4188 | MN | 36  | Sputum | N/A    | N/A |
| 1995 | D-4196 | AZ | 84  | BAL    | N/A    | N/A |
| 1995 | D-4200 | DE | 224 | Sputum | N/A    | N/A |
| 1995 | D-4213 | OH | 1   | BAL    | N/A    | N/A |
| 1995 | D-4215 | GA | 1   | N/A    | N/A    | N/A |
| 1996 | D-4265 | NJ | 36  | Sputum | N/A    | N/A |
| 1996 | D-4269 | CO | 523 | BAL    | N/A    | N/A |
| 1996 | D-4283 | IL | 213 | Sputum | N/A    | N/A |
| 1996 | D-4284 | DE | 259 | BAL    | N/A    | N/A |
| 1996 | D-4299 | AZ | 59  | BAL    | N/A    | N/A |
| 1996 | D-4312 | MS | 8   | Sputum | N/A    | N/A |
| 1996 | D-4314 | IL | 1   | N/A    | N/A    | N/A |
| 1996 | D-4328 | OH | 205 | BAL    | N/A    | N/A |
| 1996 | D-4329 | GA | 523 | Lung   | N/A    | N/A |
| 1996 | D-4335 | OH | 795 | BAL    | Female | 74  |
| 1996 | D-4346 | PA | 796 | Lung   | Female | N/A |
| 1996 | D-4350 | CO | 256 | Lung   | N/A    | N/A |
| 1996 | D-4351 | SC | 59  | BAL    | N/A    | N/A |
| 1996 | D-4365 | NJ | 42  | Sputum | N/A    | N/A |
| 1996 | D-4369 | AZ | 797 | Sputum | Male   | 38  |

|      |          |    |     |        |        |     |
|------|----------|----|-----|--------|--------|-----|
| 1996 | D-4377   | CO | 259 | Lung   | N/A    | N/A |
| 1997 | D-4414   | AZ | 56  | Sputum | N/A    | N/A |
| 1997 | D-4422   | MI | 37  | BAL    | N/A    | N/A |
| 1997 | D-4454   | AZ | 48  | Sputum | N/A    | N/A |
| 1997 | D-4457   | RI | 1   | BAL    | N/A    | N/A |
| 1997 | D-4469   | CO | 62  | Sputum | N/A    | N/A |
| 1997 | D-4470   | CA | 36  | BAL    | N/A    | N/A |
| 1997 | D-4494   | MD | 59  | Sputum | N/A    | N/A |
| 1997 | D-4499   | TN | 798 | N/A    | N/A    | N/A |
| 1997 | D-4501   | TN | 799 | Sputum | Male   | 61  |
| 1997 | D-4512   | MO | 819 | BAL    | N/A    | N/A |
| 1997 | D-4516   | IL | 800 | Sputum | Male   | 47  |
| 1997 | D-4531   | NE | 84  | BAL    | N/A    | N/A |
| 1997 | D-4532   | OH | 213 | N/A    | N/A    | N/A |
| 1997 | D-4622   | GA | 272 | BAL    | Male   | N/A |
| 1997 | D-4633   | NM | 231 | Sputum | Male   | N/A |
| 1998 | D-4640   | IL | 62  | Sputum | Male   | N/A |
| 1998 | D-4647   | OH | 36  | N/A    | N/A    | N/A |
| 1998 | D-4661   | MA | 62  | Sputum | Male   | N/A |
| 1998 | D-4667   | GA | 36  | BAL    | Female | N/A |
| 1998 | D-4678   | UT | 1   | BAL    | Male   | N/A |
| 1998 | D-4679   | SD | 1   | Blood  | Male   | N/A |
| 1998 | D-4683   | NJ | 36  | BAL    | Male   | N/A |
| 1998 | D-4684   | GA | 1   | Sputum | Female | N/A |
| 1998 | D-4694   | AZ | 763 | Sputum | Male   | N/A |
| 1998 | D-4698   | PA | 294 | BAL    | Male   | N/A |
| 1998 | D-4699   | IL | 780 | Sputum | Female | 71  |
| 1998 | D-4703   | CO | 801 | BAL    | Male   | 50  |
| 1998 | D-4707   | PA | 222 | BAL    | Female | N/A |
| 1998 | D-4721   | AZ | 1   | N/A    | Female | N/A |
| 1998 | D-4724   | OH | 42  | BAL    | Male   | N/A |
| 1998 | D-4747   | IN | 36  | N/A    | Female | N/A |
| 1998 | D-4764   | NY | 62  | Lung   | Female | N/A |
| 1999 | D-4788   | CA | 802 | BAL    | Female | N/A |
| 1999 | D-4789   | CO | 275 | Sputum | Female | N/A |
| 1999 | D-4795   | RI | 1   | Sputum | Male   | N/A |
| 1999 | D-4803   | GA | 803 | BAL    | Male   | N/A |
| 1999 | D-4831   | IL | 224 | BAL    | Female | N/A |
| 1999 | D-4832   | MD | 1   | BAL    | Female | N/A |
| 1999 | D-4846   | WA | 1   | N/A    | N/A    | N/A |
| 1999 | D-4875   | IL | 1   | BAL    | Male   | N/A |
| 1999 | D-D-4882 | PA | 804 | Lung   | Male   | 48  |
| 1999 | D-4894   | OH | 1   | BAL    | Female | N/A |
| 1999 | D-4897   | VT | 805 | BAL    | Female | 43  |

|      |        |    |     |                      |        |     |
|------|--------|----|-----|----------------------|--------|-----|
| 1999 | D-4911 | DE | 259 | ET tube <sup>e</sup> | Female | N/A |
| 1999 | D-4916 | RI | 62  | Sputum               | Female | N/A |
| 1999 | D-4930 | CO | 37  | BAL                  | Male   | N/A |
| 1999 | D-4939 | GA | 36  | BAL                  | Male   | N/A |
| 2000 | D-4959 | AZ | 1   | N/A                  | Female | N/A |
| 2000 | D-4961 | CA | 1   | BAL                  | Male   | N/A |
| 2000 | D-4962 | GA | 36  | BAL                  | Male   | N/A |
| 2000 | D-4970 | KS | 806 | Sputum               | Female | 74  |
| 2000 | D-4987 | AZ | 1   | BAL                  | Female | N/A |
| 2000 | D-4990 | VA | 62  | N/A                  | N/A    | N/A |
| 2000 | D-4991 | VA | 259 | N/A                  | Male   | N/A |
| 2000 | D-4998 | IL | 27  | Lung                 | Female | N/A |
| 2000 | D-5013 | OH | 222 | BAL                  | Female | N/A |
| 2000 | D-5015 | IL | 807 | BAL                  | Female | 69  |
| 2000 | D-5040 | RI | 37  | BAL                  | Female | N/A |
| 2000 | D-5041 | CT | 1   | BAL                  | Male   | N/A |
| 2000 | D-5042 | GA | 143 | Lung                 | Male   | N/A |
| 2000 | D-5057 | UT | 1   | BAL                  | Male   | N/A |
| 2000 | D-5058 | CO | 224 | BAL                  | Male   | N/A |
| 2000 | D-5065 | DE | 808 | Pleural fluid        | Female | 39  |
| 2001 | D-5081 | AZ | 1   | N/A                  | Female | N/A |
| 2001 | D-5082 | CO | 37  | BAL                  | Male   | N/A |
| 2001 | D-5123 | AZ | 1   | Sputum               | Male   | N/A |
| 2001 | D-5124 | SD | 1   | Lung                 | Male   | N/A |
| 2001 | D-5166 | OH | 42  | BAL                  | Female | N/A |
| 2001 | D-5177 | AZ | 1   | N/A                  | N/A    | N/A |
| 2001 | D-5201 | IN | 266 | BAL                  | Male   | N/A |
| 2001 | D-5205 | OH | 251 | Sputum               | Female | N/A |
| 2001 | D-5211 | NH | 1   | BAL                  | Male   | N/A |
| 2001 | D-5213 | IL | 1   | BAL                  | Female | N/A |
| 2001 | D-5219 | CT | 222 | Sputum               | Female | N/A |
| 2001 | D-5223 | OH | 222 | BAL                  | Male   | N/A |
| 2001 | D-5225 | NC | 36  | BAL                  | Male   | N/A |
| 2001 | D-5228 | OH | 267 | BAL                  | Female | N/A |
| 2001 | D-5235 | GA | 268 | BAL                  | Male   | N/A |
| 2001 | D-5241 | OH | 213 | BAL                  | Male   | N/A |
| 2002 | D-5245 | OH | 1   | Lung                 | Female | N/A |
| 2002 | D-5247 | OH | 1   | ET tube              | Male   | N/A |
| 2002 | D-5259 | OH | 62  | Sputum               | Male   | N/A |
| 2002 | D-5270 | AZ | 1   | BAL                  | Female | N/A |
| 2002 | D-5285 | OH | 205 | BAL                  | Female | N/A |
| 2002 | D-5286 | IL | 256 | BAL                  | Male   | N/A |
| 2002 | D-5287 | NM | 252 | Pleural fluid        | Male   | N/A |
| 2002 | D-5291 | GA | 269 | BAL                  | Female | N/A |



|      |        |    |     |         |        |     |
|------|--------|----|-----|---------|--------|-----|
| 2002 | D-5295 | OH | 222 | ET tube | Male   | N/A |
| 2002 | D-5297 | AZ | 1   | Sputum  | Male   | N/A |
| 2002 | D-5307 | CT | 18  | Sputum  | Male   | N/A |
| 2003 | D-5318 | OH | 1   | BAL     | Female | N/A |
| 2003 | D-5326 | GA | 1   | N/A     | Male   | N/A |
| 2003 | D-5330 | NM | 253 | Sputum  | Male   | N/A |
| 2003 | D-5333 | AZ | 271 | BAL     | Female | N/A |
| 2003 | D-5342 | CO | 109 | Sputum  | Male   | N/A |
| 2003 | D-5345 | IN | 42  | BAL     | Male   | N/A |
| 2003 | D-5347 | OH | 270 | BAL     | Male   | N/A |
| 2003 | D-5348 | OH | 288 | Sputum  | Male   | N/A |
| 2003 | D-5351 | NH | 22  | BAL     | Male   | N/A |
| 2003 | D-5353 | PA | 271 | BAL     | Female | N/A |
| 2003 | D-5357 | PA | 94  | BAL     | Male   | N/A |
| 2003 | D-5361 | OH | 59  | BAL     | Female | N/A |
| 2003 | D-5371 | RI | 213 | BAL     | Male   | N/A |
| 2003 | D-5372 | IL | 222 | BAL     | Male   | N/A |
| 2003 | D-5375 | OH | 205 | BAL     | Female | N/A |
| 2003 | D-5378 | AZ | 37  | N/A     | Male   | N/A |
| 2003 | D-5380 | OH | 213 | BAL     | Male   | N/A |
| 2003 | D-5381 | WI | 59  | Blood   | Male   | N/A |
| 2003 | D-5384 | IL | 37  | BAL     | Male   | N/A |
| 2004 | D-5385 | IL | 222 | BAL     | Male   | N/A |
| 2004 | D-5389 | NJ | 36  | Sputum  | Male   | N/A |
| 2004 | D-5390 | OH | 94  | BAL     | Male   | N/A |
| 2004 | D-5399 | AZ | 260 | Sputum  | Male   | N/A |
| 2004 | D-5411 | AZ | 89  | BAL     | Male   | N/A |
| 2004 | D-5416 | GA | 22  | BAL     | Male   | N/A |
| 2004 | D-5422 | SD | 37  | BAL     | Female | N/A |
| 2004 | D-5423 | RI | 213 | BAL     | Female | N/A |
| 2004 | D-5425 | IL | 62  | ET tube | Male   | N/A |
| 2004 | D-5429 | OH | 224 | BAL     | Male   | N/A |
| 2004 | D-5431 | RI | 272 | BAL     | Male   | N/A |
| 2004 | D-5439 | RI | 213 | BAL     | Female | N/A |
| 2004 | D-5446 | AZ | 273 | BAL     | Male   | N/A |
| 2005 | D-5463 | OH | 274 | BAL     | Female | N/A |
| 2005 | D-5464 | AZ | 89  | BAL     | Female | N/A |
| 2005 | D-5465 | IL | 1   | N/A     | N/A    | N/A |
| 2005 | D-5466 | CO | 205 | N/A     | Female | N/A |
| 2005 | D-5467 | AZ | 37  | BAL     | Male   | N/A |
| 2005 | D-5468 | IL | 1   | BAL     | Female | N/A |
| 2005 | D-5469 | IL | 62  | Sputum  | Male   | N/A |
| 2005 | D-5471 | AZ | 42  | Sputum  | Female | N/A |
| 2005 | D-5480 | IL | 154 | Sputum  | Male   | N/A |

|      |          |    |     |             |        |     |
|------|----------|----|-----|-------------|--------|-----|
| 2005 | D-5483   | SD | 42  | Sputum      | Female | N/A |
| 2005 | D-5487   | CT | 276 | Sputum      | Male   | N/A |
| 2005 | D-5489   | SD | 1   | Sputum      | Female | N/A |
| 2005 | D-5491   | IL | 1   | BAL         | N/A    | N/A |
| 2005 | D-5492   | RI | 213 | BAL         | Male   | N/A |
| 2005 | D-5498   | OH | 1   | BAL         | Male   | N/A |
| 2005 | D-5512   | KY | 109 | BAL         | N/A    | N/A |
| 2005 | D-5513   | ME | 37  | BAL         | Female | N/A |
| 2005 | D-5515   | IL | 1   | N/A         | Male   | N/A |
| 2005 | D-5519   | HI | 1   | Ankle fluid | Female | N/A |
| 2005 | D-5522   | AZ | 1   | Sputum      | Male   | N/A |
| 2005 | D-5535   | IL | 1   | BAL         | Female | N/A |
| 2006 | D-5547   | SD | 278 | Sputum      | Male   | N/A |
| 2006 | D-5548   | AZ | 1   | BAL         | Female | N/A |
| 2006 | D-5549   | MN | 35  | N/A         | N/A    | N/A |
| 2006 | D-5555   | WA | 211 | Sputum      | Female | N/A |
| 2006 | D-5556   | AZ | 291 | BAL         | Male   | N/A |
| 2006 | D-5558   | OH | 1   | BAL         | Male   | N/A |
| 2006 | D-5565   | IN | 289 | Sputum      | Female | N/A |
| 2006 | D-5567   | CO | 290 | Sputum      | Female | N/A |
| 2006 | D-5572   | IN | 62  | BAL         | Female | N/A |
| 2006 | D-5573   | IL | 213 | BAL         | Male   | N/A |
| 2006 | D-5577   | OH | 258 | BAL         | Female | N/A |
| 2006 | D-5579   | IL | 222 | BAL         | Male   | N/A |
| 2006 | D-5580   | CO | 259 | BAL         | Male   | N/A |
| 2006 | D-5585   | NY | 289 | BAL         | Male   | N/A |
| 2006 | D-5586   | AZ | 37  | BAL         | Female | N/A |
| 2006 | D-5592   | OH | 288 | BAL         | Male   | N/A |
| 2006 | D-5593   | ME | 62  | BAL         | Female | N/A |
| 2006 | D-5594   | IL | 222 | Sputum      | Male   | N/A |
| 2006 | D-5596   | AZ | 44  | BAL         | N/A    | N/A |
| 2006 | D-5597   | AZ | 294 | BAL         | Male   | N/A |
| 2006 | D-5606   | IL | 62  | BAL         | Male   | N/A |
| 2006 | D-5611   | CO | 37  | Sputum      | Male   | N/A |
| 2006 | D-5615   | AZ | 260 | BAL         | Male   | N/A |
| 2007 | D-5622   | UT | 1   | BAL         | Male   | N/A |
| 2007 | D-5625   | OH | 1   | BAL         | Female | N/A |
| 2007 | D-5627   | RI | 1   | Sputum      | Male   | N/A |
| 2007 | D-5628   | CO | 271 | BAL         | Male   | N/A |
| 2007 | D-5629   | OH | 1   | BAL         | Male   | N/A |
| 2007 | D-5631   | OH | 36  | BAL         | Male   | N/A |
| 2007 | D-5640   | GA | 1   | BAL         | Female | N/A |
| 2007 | D-D-5648 | HI | 89  | Sputum      | Male   | N/A |
| 2007 | D-5655   | RI | 1   | BAL         | Male   | N/A |

|      |        |    |     |        |        |     |
|------|--------|----|-----|--------|--------|-----|
| 2007 | D-5667 | CO | 42  | BAL    | Male   | N/A |
| 2007 | D-5668 | MN | 1   | BAL    | Female | N/A |
| 2007 | D-5669 | IL | 704 | BAL    | Male   | N/A |
| 2007 | D-5670 | CO | 42  | BAL    | Male   | N/A |
| 2007 | D-5674 | KY | 792 | BAL    | Male   | N/A |
| 2007 | D-5676 | NH | 62  | BAL    | Female | N/A |
| 2007 | D-5679 | IL | 1   | Sputum | Male   | N/A |
| 2007 | D-5680 | ME | 213 | BAL    | Male   | N/A |
| 2007 | D-5681 | IL | 794 | Sputum | Male   | 66  |
| 2007 | D-5683 | RI | 1   | BAL    | Male   | N/A |
| 2007 | D-5684 | KY | 792 | Sputum | Male   | N/A |
| 2007 | D-5687 | AZ | 763 | BAL    | Female | N/A |
| 2007 | D-5693 | AZ | 115 | BAL    | Female | N/A |
| 2007 | D-5696 | IL | 36  | TTA    | Male   | N/A |
| 2007 | D-5701 | AZ | 59  | Sputum | Female | N/A |
| 2007 | D-5704 | OH | 59  | BAL    | Male   | N/A |
| 2007 | D-5707 | ME | 776 | N/A    | Male   | N/A |
| 2007 | D-5709 | SC | 545 | Sputum | Male   | N/A |
| 2008 | D-5714 | IL | 1   | BAL    | Female | N/A |
| 2008 | D05718 | AZ | 42  | BAL    | Female | N/A |
| 2008 | D-5719 | CO | 42  | N/A    | Male   | N/A |
| 2008 | D-5722 | PA | 89  | BAL    | Male   | N/A |
| 2008 | D-5723 | RI | 886 | BAL    | Female | N/A |
| 2008 | D-5724 | GA | 271 | Lung   | Male   | N/A |
| 2008 | D-5725 | NH | 109 | BAL    | Male   | N/A |
| 2008 | D-5728 | IL | 37  | TTA    | Female | N/A |
| 2008 | D-5729 | AZ | 822 | N/A    | Female | N/A |
| 2008 | D-5730 | SC | 943 | N/A    | Male   | N/A |
| 2008 | D-5734 | WV | 701 | BAL    | Female | N/A |
| 2008 | D-5735 | WV | 224 | BAL    | Female | N/A |
| 2008 | D-5737 | IL | 94  | BAL    | Female | N/A |
| 2008 | D-5749 | WI | 37  | BAL    | Male   | N/A |
| 2008 | D-5756 | IL | 1   | Lung   | Male   | N/A |
| 2008 | D-5761 | IL | 62  | N/A    | Male   | N/A |
| 2008 | D-5764 | IN | 563 | BAL    | Female | N/A |
| 2008 | D-5765 | IL | 183 | BAL    | Male   | N/A |
| 2008 | D-5767 | AZ | 1   | BAL    | Female | N/A |
| 2008 | D-5768 | HI | 36  | Sputum | Male   | N/A |
| 2008 | D-5771 | NJ | 585 | Sputum | N/A    | N/A |
| 2008 | D-5775 | AK | 1   | Sputum | Male   | 68  |
| 2008 | D-5776 | AZ | 617 | BAL    | Male   | N/A |
| 2008 | D-5777 | AZ | 619 | BAL    | Male   | N/A |
| 2008 | D-5779 | OH | 618 | URS    | Female | N/A |
| 2008 | D-5783 | NM | 1   | BAL    | Female | N/A |

|      |        |    |      |        |        |     |
|------|--------|----|------|--------|--------|-----|
| 2009 | D-5784 | NC | 44   | Sputum | Male   | N/A |
| 2009 | D-5791 | TX | 1    | Sputum | Male   | N/A |
| 2009 | D-5794 | NC | 36   | Sputum | Male   | N/A |
| 2009 | D-5795 | OH | 1    | BAL    | Male   | N/A |
| 2009 | D-5797 | OH | 36   | BAL    | Male   | N/A |
| 2009 | D-5801 | IN | 944  | Sputum | Female | N/A |
| 2009 | D-5834 | OK | 271  | Sputum | N/A    | N/A |
| 2009 | D-5836 | OH | 750  | BAL    | Female | N/A |
| 2009 | D-5837 | VA | 799  | Blood  | Male   | N/A |
| 2009 | D-5838 | IN | 828  | Sputum | Female | 49  |
| 2009 | D-5839 | AZ | 1    | BAL    | Male   | N/A |
| 2009 | D-5844 | AZ | 829  | BAL    | Female | 61  |
| 2009 | D-5845 | AZ | 89   | Sputum | Male   | N/A |
| 2009 | D-5860 | OH | 750  | BAL    | Male   | N/A |
| 2009 | D-5862 | IL | 42   | N/A    | Female | N/A |
| 2009 | D-5866 | IL | 830  | BAL    | Male   | N/A |
| 2009 | D-5867 | NY | 637  | URS    | Male   | N/A |
| 2009 | D-5868 | NY | 896  | URS    | Male   | N/A |
| 2009 | D-5869 | NY | 730  | URS    | Male   | N/A |
| 2009 | D-5872 | NY | 62   | URS    | Male   | N/A |
| 2009 | D-5873 | NY | 731  | URS    | Female | N/A |
| 2009 | D-5874 | NY | 62   | URS    | Male   | N/A |
| 2009 | D-5876 | NY | 222  | URS    | Male   | N/A |
| 2009 | D-5877 | NY | 732  | Sputum | Male   | N/A |
| 2009 | D-5878 | NY | 730  | Sputum | Female | N/A |
| 2009 | D-5881 | NY | 222  | URS    | Male   | N/A |
| 2009 | D-5882 | NY | 731  | URS    | Female | N/A |
| 2009 | D-5883 | AZ | 1    | BAL    | Female | N/A |
| 2009 | D-5887 | WI | 37   | Sputum | Male   | N/A |
| 2009 | D-5888 | NY | 731  | N/A    | Male   | 55  |
| 2009 | D-5889 | OH | 222  | N/A    | Female | 61  |
| 2009 | D-5896 | OH | 36   | BAL    | Male   | 84  |
| 2009 | D-5908 | NM | 42   | TTA    | Male   | 52  |
| 2009 | D-5909 | NM | 42   | N/A    | N/A    | N/A |
| 2009 | D-5916 | IN | 222  | BAL    | Female | 59  |
| 2009 | D-5941 | AZ | 1405 | BAL    | Female | 71  |
| 2009 | D-5948 | AZ | 1    | BAL    | Female | 89  |
| 2009 | D-5958 | MD | 251  | Sputum | Male   | 55  |
| 2010 | D-5965 | IL | 878  | N/A    | Male   | 61  |
| 2010 | D-5966 | GA | 1    | BAL    | Female | 30  |
| 2010 | D-5970 | AZ | 1    | Sputum | Male   | 66  |
| 2010 | D-5972 | RI | 1    | BAL    | Male   | 51  |
| 2010 | D-5974 | AZ | 89   | BAL    | Male   | 61  |
| 2010 | D-5975 | IL | 1    | BAL    | Male   | 66  |

|      |        |    |      |              |        |     |
|------|--------|----|------|--------------|--------|-----|
| 2010 | D-5986 | MN | 260  | BAL          | Male   | 66  |
| 2010 | D-5987 | TN | 272  | BAL          | Male   | 44  |
| 2010 | D-5989 | TN | 170  | BAL          | Male   | 40  |
| 2010 | D-5994 | MD | 22   | Sputum       | Male   | 60  |
| 2010 | D-5997 | AZ | 260  | BAL          | N/A    | 42  |
| 2010 | D-6001 | AZ | 1    | BAL          | Female | 58  |
| 2010 | D-6004 | RI | 213  | Sputum       | Female | 57  |
| 2010 | D-6008 | TX | 35   | Sputum       | Male   | 31  |
| 2010 | D-6009 | IL | 942  | N/A          | Female | 54  |
| 2010 | D-6010 | IL | 48   | N/A          | Male   | 57  |
| 2010 | D-6013 | TX | 1    | BAL          | Male   | 55  |
| 2010 | D-6016 | AZ | 617  | BAL          | Male   | 58  |
| 2010 | D-6017 | SC | 143  | Lung         | Male   | 31  |
| 2010 | D-6022 | CO | 1    | BAL          | Male   | 68  |
| 2010 | D-6026 | NY | 1400 | Sputum       | Male   | 21  |
| 2011 | D-6033 | AZ | 1    | BAL          | Male   | 61  |
| 2011 | D-7008 | IL | 222  | Sputum       | Female | 38  |
| 2011 | D-7016 | AZ | 1217 | BAL          | Male   | 68  |
| 2011 | D-7020 | GA | 1218 | Sputum       | Female | 81  |
| 2011 | D-7021 | IL | 42   | BAL          | Male   | 77  |
| 2011 | D-7025 | CO | 278  | N/A          | Male   | 86  |
| 2011 | D-7030 | TX | 1    | BAL          | Male   | 81  |
| 2011 | D-7033 | NM | 59   | BAL          | Male   | 65  |
| 2011 | D-7034 | NM | 48   | Neck abscess | Male   | 24  |
| 2011 | D-7037 | AZ | 1    | BAL          | Female | 57  |
| 2011 | D-7038 | CO | 222  | BAL          | Male   | 58  |
| 2011 | D-7043 | RI | 1    | BAL          | Female | 61  |
| 2011 | D-7051 | CO | 275  | Sputum       | Male   | 60  |
| 2011 | D-7053 | CO | 259  | BAL          | N/A    | N/A |
| 2011 | D-7054 | CO | 275  | BAL          | Male   | N/A |
| 2011 | D-7055 | GA | 1235 | BAL          | Female | N/A |
| 2012 | D-7067 | IL | 1    | Sputum       | Male   | 64  |
| 2012 | D-7068 | AZ | 1    | BAL          | Male   | 72  |
| 2012 | D-7071 | GA | 45   | BAL          | Male   | 57  |
| 2012 | D-7072 | AZ | 1    | BAL          | Female | 75  |
| 2012 | D-7081 | TX | 1    | BAL          | Male   | 69  |
| 2012 | D-7082 | RI | 222  | Sputum       | N/A    | 21  |
| 2012 | D-7102 | IL | 222  | BAL          | Female | 29  |
| 2012 | D-7103 | AZ | 42   | BAL          | Male   | 49  |
| 2012 | D-7117 | WI | 62   | BAL          | Male   | 76  |
| 2012 | D-7125 | WI | 213  | BAL          | Male   | 20  |
| 2012 | D-7130 | WI | 275  | Lung         | Male   | 11  |
| 2012 | D-7131 | WI | 213  | BAL          | Female | 60  |

|      |        |    |     |        |        |    |
|------|--------|----|-----|--------|--------|----|
| 2012 | D-7132 | AZ | 1   | Sputum | Female | 71 |
| 2012 | D-7137 | AZ | 1   | BAL    | Male   | 59 |
| 2012 | D-7139 | AZ | 37  | BAL    | Male   | 60 |
| 2012 | D-7142 | AZ | 1   | BAL    | Female | 83 |
| 2012 | D-7143 | DC | 37  | TTA    | Female | 66 |
| 2012 | D-7144 | WI | 222 | BAL    | Female | 58 |
| 2012 | D-7154 | PA | 154 | Sputum | N/A    | 24 |
| 2012 | D-7155 | PA | 8   | Sputum | N/A    | 80 |
| 2012 | D-7156 | PA | 154 | Sputum | Male   | 70 |
| 2012 | D-7157 | PA | 213 | Sputum | Male   | 57 |

<sup>a</sup>N/A - information is unavailable for this isolate

<sup>b</sup>BAL - bronchioloalveolar lavage

<sup>c</sup>TTA - transtracheal aspirate

<sup>d</sup>URS - undefined respiratory specimen

<sup>e</sup>ET - tube endotracheal tube

Table S2. STs of Lp1 environmental isolates

| Year of isolation | Lab number | State of origin | ST  | Source type      |
|-------------------|------------|-----------------|-----|------------------|
| 2003              | F-2098     | CA              | 923 | potable          |
| 2003              | F-2157     | CA              | 1   | potable          |
| 2003              | F-2312     | CA              | 1   | potable          |
| 2006              | E-101      | NY              | 1   | N/A <sup>A</sup> |
| 2006              | E-103      | CA              | 283 | N/A              |
| 2006              | E-104      | MD              | 1   | N/A              |
| 2006              | E-105      | CA              | 284 | N/A              |
| 2006              | E-106      | MD              | 8   | N/A              |
| 2006              | E-107      | DE              | 8   | N/A              |
| 2006              | E-108      | WY              | 285 | N/A              |
| 2006              | E-109      | TX              | 8   | N/A              |
| 2006              | E-110      | TN              | 8   | N/A              |
| 2006              | E-111      | MD              | 1   | N/A              |
| 2006              | E-112      | GA              | 265 | N/A              |
| 2006              | E-113      | CA              | 296 | N/A              |
| 2006              | E-114      | NH              | 257 | N/A              |
| 2006              | E-115      | OH              | 1   | N/A              |
| 2006              | E-116      | NY              | 1   | N/A              |
| 2006              | E-117      | TX              | 282 | N/A              |
| 2006              | E-118      | CA              | 8   | N/A              |
| 2006              | E-119      | MS              | 263 | N/A              |
| 2006              | E-120      | RI              | 154 | N/A              |
| 2006              | E-121      | NY              | 1   | N/A              |
| 2006              | E-122      | LA              | 264 | N/A              |
| 2006              | E-123      | CA              | 1   | N/A              |
| 2006              | E-124      | NJ              | 1   | N/A              |
| 2006              | E-125      | OH              | 8   | N/A              |
| 2006              | E-126      | MI              | 287 | N/A              |
| 2006              | E-50       | CA              | 1   | N/A              |
| 2006              | E-53       | MN              | 279 | N/A              |
| 2006              | E-59       | TX              | 262 | N/A              |
| 2006              | E-60       | MA              | 1   | N/A              |
| 2006              | E-61       | IL              | 261 | N/A              |
| 2006              | E-62       | TX              | 1   | N/A              |
| 2006              | E-64       | MA              | 296 | N/A              |
| 2006              | E-65       | MN              | 36  | N/A              |
| 2006              | E-67       | PA              | 1   | N/A              |
| 2006              | E-69       | TX              | 280 | N/A              |
| 2006              | E-72       | FL              | 154 | N/A              |
| 2006              | E-73       | MS              | 281 | N/A              |

|      |        |         |     |               |
|------|--------|---------|-----|---------------|
| 2006 | E-77   | TX      | 282 | N/A           |
| 2006 | E-79   | MD      | 1   | N/A           |
| 2006 | E-81   | OH      | 8   | N/A           |
| 2006 | E-82   | NJ      | 1   | N/A           |
| 2006 | E-87   | TX      | 1   | N/A           |
| 2006 | E-88   | MD      | 8   | N/A           |
| 2006 | E-89   | NJ      | 1   | N/A           |
| 2006 | F-2877 | MA      | 286 | N/A           |
| 2006 | F-2879 | MI      | 1   | N/A           |
| 2006 | F-2885 | IL      | 7   | N/A           |
| 2006 | F-2887 | MI      | 1   | N/A           |
| 2006 | F-2889 | TN      | 1   | N/A           |
| 2006 | F-2891 | MN      | 1   | N/A           |
| 2008 | F-3060 | CA      | 1   | potable       |
| 2008 | F-3235 | CA      | 903 | potable       |
| 2010 | F-3723 | FL      | 8   | cooling tower |
| 2010 | F-3724 | IN      | 965 | cooling tower |
| 2010 | F-3725 | NY      | 1   | cooling tower |
| 2010 | F-3726 | CO      | 1   | non-potable   |
| 2010 | F-3727 | MO      | 1   | cooling tower |
| 2010 | F-3887 | NJ      | 1   | potable       |
| 2010 | F-3888 | MO      | 1   | potable       |
| 2010 | F-3889 | KY      | 1   | cooling tower |
| 2010 | F-3890 | PA      | 259 | potable       |
| 2010 | F-3891 | PA      | 945 | cooling tower |
| 2010 | F-3892 | AZ      | 1   | potable       |
| 2010 | F-3893 | NJ      | 1   | potable       |
| 2010 | F-3894 | IL      | 904 | cooling tower |
| 2010 | F-3895 | OH      | 1   | non-potable   |
| 2010 | F-3896 | CA      | 296 | cooling tower |
| 2010 | F-3936 | FL      | 8   | cooling tower |
| 2010 | F-3943 | FL      | 10  | cooling tower |
| 2010 | F-3961 | OH      | 1   | cooling tower |
| 2010 | F-3962 | NJ      | 1   | potable       |
| 2010 | F-3963 | NY      | 221 | non-potable   |
| 2010 | F-3964 | MO      | 1   | cooling tower |
| 2010 | F-3965 | OH      | 1   | non-potable   |
| 2010 | F-3966 | FL      | 8   | non-potable   |
| 2010 | F-3967 | unknown | 1   | cooling tower |
| 2010 | F-3968 | CT      | 1   | cooling tower |
| 2010 | F-3969 | NY      | 971 | cooling tower |
| 2010 | F-3970 | PA      | 1   | potable       |
| 2010 | F-3971 | AL      | 1   | potable       |
| 2011 | F-3980 | PA      | 252 | potable       |



|      |               |                  |      |               |
|------|---------------|------------------|------|---------------|
| 2011 | F-3981        | CA               | 1    | potable       |
| 2011 | F-3982        | AR               | 8    | cooling tower |
| 2011 | F-3983        | NJ               | 36   | potable       |
| 2011 | F-3984        | MD               | 1140 | potable       |
| 2011 | F-3985        | NJ               | 1142 | potable       |
| 2011 | F-3986        | KS               | 1141 | potable       |
| 2011 | F-3988        | FL               | 1    | cooling tower |
| 2011 | F-3989        | FL               | 1    | potable       |
| 2011 | F-4038        | MS               | 59   | potable       |
| 2011 | F-4039        | NJ               | 1    | potable       |
| 2011 | F-4040        | FL               | 1    | potable       |
| 2011 | F-4041        | PA               | 1216 | potable       |
| 2011 | F-4042        | VT               | 1    | potable       |
| 2011 | F-4043        | OH               | 1    | potable       |
| 2011 | F-4044        | MI               | 1    | potable       |
| 2011 | F-4045        | FL               | 1    | potable       |
| 2011 | F-4046        | PA               | 796  | cooling tower |
| 2011 | F-4047        | MN               | 1    | potable       |
| 2011 | F-4118        | TX               | 42   | potable       |
| 2011 | F-4119        | AR               | 36   | cooling tower |
| 2011 | F-4120        | TX               | 1    | potable       |
| 2011 | F-4121        | AL               | 763  | cooling tower |
| 2011 | F-4122        | PA               | 752  | cooling tower |
| 2011 | F-4123        | OH               | 1161 | cooling tower |
| 2011 | F-4124        | MA               | 1    | cooling tower |
| 2011 | F-4125        | FL               | 10   | cooling tower |
| 2011 | F-4126        | Puerto Rico      | 1157 | cooling tower |
| 2011 | F-4127        | NJ               | 1    | potable       |
| 2011 | F-4128        | TN               | 1    | fountain      |
| 2011 | F-4129        | MO               | 1    | cooling tower |
| 2011 | F-4130        | PA               | 1    | potable       |
| 2011 | NAV-11-1-15c1 | NAV <sup>b</sup> | 1    | cistern       |
| 2011 | NAV-11-1-16c1 | NAV              | 1    | cistern       |
| 2011 | NAV-11-1-19c1 | NAV              | 1    | cistern       |
| 2011 | NAV-11-1-38c1 | NAV              | 59   | cistern       |
| 2011 | NAV-11-1-73c1 | NAV              | 59   | cistern       |
| 2012 | F-4154        | TX               | 1    | potable       |
| 2012 | F-4155        | VT               | 37   | potable       |
| 2012 | F-4156        | TX               | 36   | potable       |
| 2012 | F-4157        | NJ               | 1399 | non-potable   |
| 2012 | F-4158        | CA               | 278  | potable       |
| 2012 | F-4159        | MA               | 1    | cooling tower |
| 2012 | F-4160        | CA               | 1    | potable       |
| 2012 | F4161         | NJ               | 1    | cooling tower |

|      |       |    |      |               |
|------|-------|----|------|---------------|
| 2012 | F4162 | TX | 1    | cooling tower |
| 2012 | F4168 | NV | 36   | potable       |
| 2012 | F4169 | CA | 1    | potable       |
| 2012 | F4170 | AL | 36   | cooling tower |
| 2012 | F4171 | NJ | 1    | cooling tower |
| 2012 | F4172 | LA | 1398 | cooling tower |
| 2012 | F4225 | TX | 1    | potable       |
| 2012 | F4226 | KY | 1    | potable       |
| 2012 | F4227 | WI | 8    | cooling tower |
| 2012 | F4228 | FL | 1398 | cooling tower |
| 2012 | F4229 | NY | 1    | non-potable   |
| 2012 | F4230 | WA | 1    | cooling tower |
| 2012 | F4231 | CA | 296  | cooling tower |
| 2012 | F4232 | UT | 1    | non-potable   |
| 2012 | F4233 | IL | 1    | potable       |
| 2012 | F4234 | MD | 8    | cooling tower |
| 2012 | F4236 | CA | 763  | cooling tower |
| 2012 | F4237 | VT | 976  | potable       |
| 2012 | F4238 | CA | 1    | cooling tower |
| 2012 | F4241 | CA | 1407 | cooling tower |
| 2012 | F4242 | HI | 617  | potable       |

<sup>a</sup>N/A - information is unavailable for this isolate

<sup>b</sup>NAV – Navajo Nation (please see Materials and Methods for description)
